# Supplementary material for: A novel N/Au co-doped carbon dot probe for continuous detection of silicate and phosphate by resonance Rayleigh scattering
Source: Royal Society of Chemistry journal article supplement (doi:10.1039/c9an01072f), 2019-01-01
Supplement: c9an01072f1.pdf [file c9an01072f1.pdf]

ARTICLE

## A novel N/Au co-doped carbon dots probe for continuous detection of silicate and phosphate by resonance Rayleigh scattering

Received 00th January 20xx,  
 Accepted 00th January 20xx

Jiao Li, Chongning Li, Zhihao Zhang, Xiyin Wang, Aihui Liang, Guiqing Wen\* and Zhiliang Jiang\*

DOI: 10.1039/x0xx00000x

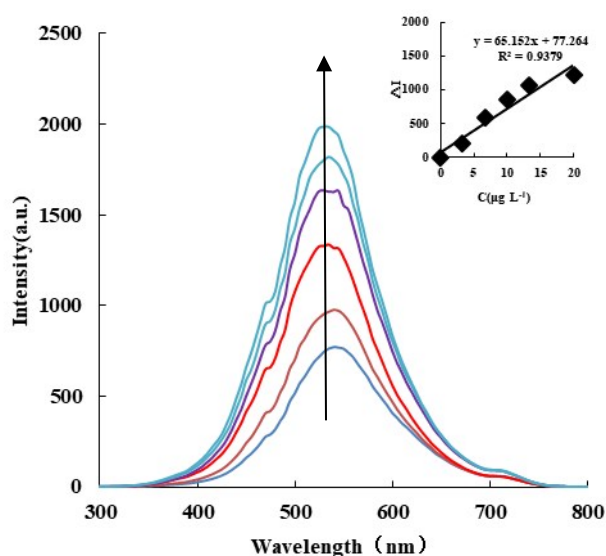

**Fig. S1** RRS spectrum of CD<sub>N/Au1</sub>-AMS-CAS-PO<sub>4</sub><sup>3-</sup>-SiO<sub>3</sub><sup>2-</sup> system (a):75mM H<sub>2</sub>SO<sub>4</sub> +9.99μg L<sup>-1</sup> PO<sub>4</sub><sup>3-</sup>+ SiO<sub>3</sub><sup>2-</sup>+3.33mg mL<sup>-1</sup>AMS+1.13mg mL<sup>-1</sup>CAS+1.6mg mL<sup>-1</sup> CD<sub>N/Au1</sub>; (b): a+3.33μg L<sup>-1</sup> SiO<sub>3</sub><sup>2-</sup>; (c): a+6.66μg L<sup>-1</sup> SiO<sub>3</sub><sup>2-</sup>; (d): a+9.99μg L<sup>-1</sup> SiO<sub>3</sub><sup>2-</sup>; (e): a+13.32μg L<sup>-1</sup> SiO<sub>3</sub><sup>2-</sup>; (f): a+16.65μg L<sup>-1</sup> SiO<sub>3</sub><sup>2-</sup>.

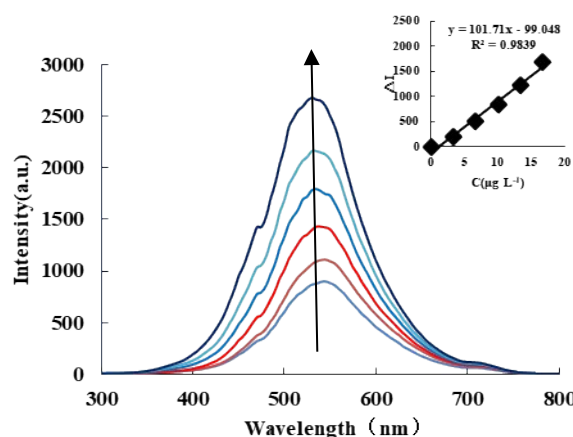

**Fig. S2** RRS spectrum of CD<sub>N/Au3</sub>-AMS-CAS-PO<sub>4</sub><sup>3-</sup>-SiO<sub>3</sub><sup>2-</sup> system (a): 75mM H<sub>2</sub>SO<sub>4</sub> +9.99μg L<sup>-1</sup> PO<sub>4</sub><sup>3-</sup>+ SiO<sub>3</sub><sup>2-</sup>+3.33mg mL<sup>-1</sup> AMS+1.13mg mL<sup>-1</sup> CAS+1.6mg mL<sup>-1</sup> CD<sub>N/Au3</sub>; (b): a+3.33μg L<sup>-1</sup> SiO<sub>3</sub><sup>2-</sup>; (c): a+6.66μg L<sup>-1</sup> SiO<sub>3</sub><sup>2-</sup>; (d): a+9.99μg L<sup>-1</sup> SiO<sub>3</sub><sup>2-</sup>; (e): a+13.32μg L<sup>-1</sup> SiO<sub>3</sub><sup>2-</sup>; (f): a+16.65μg L<sup>-1</sup> SiO<sub>3</sub><sup>2-</sup>.

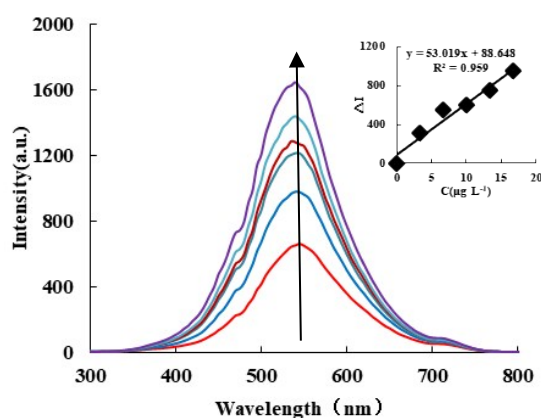

**Fig. S3** RRS spectrum of CD<sub>N/Au4</sub>-AMS-CAS-PO<sub>4</sub><sup>3-</sup>-SiO<sub>3</sub><sup>2-</sup> system (a): 75mM H<sub>2</sub>SO<sub>4</sub> +9.99μg L<sup>-1</sup> PO<sub>4</sub><sup>3-</sup>+ SiO<sub>3</sub><sup>2-</sup>+3.33mg mL<sup>-1</sup>AMS+1.13mg mL<sup>-1</sup>CAS+1.6mg mL<sup>-1</sup> CD<sub>N/Au4</sub>; (b): a+3.33μg L<sup>-1</sup> SiO<sub>3</sub><sup>2-</sup>; (c): a+6.66μg L<sup>-1</sup> SiO<sub>3</sub><sup>2-</sup>; (d): a+9.99μg L<sup>-1</sup> SiO<sub>3</sub><sup>2-</sup>; (e): a+13.32μg L<sup>-1</sup> SiO<sub>3</sub><sup>2-</sup>; (f): a+16.65μg L<sup>-1</sup> SiO<sub>3</sub><sup>2-</sup>.

<sup>a</sup>Key Laboratory of Ecology of Rare and Endangered Species and Environmental Protection (Guangxi Normal University), Ministry of Education; Guangxi Key Laboratory of Environmental Pollution Control Theory and Technology, Guilin 541004, China. E-mail: zljjiang@mailbox.gxnu.edu.cn.

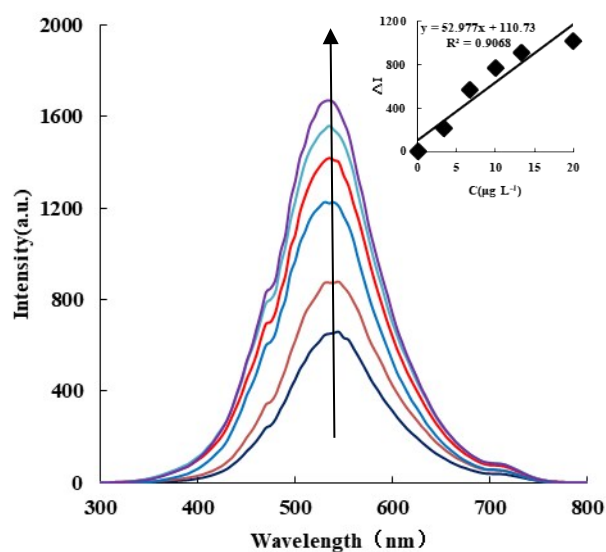

**Fig. S4** RRS spectrum of  $CD_{N/Au1}$ -AMS- $PO_4^{3-}$  system (a): 75mM  $H_2SO_4$  +  $PO_4^{3-}$  + 3.33mg  $mL^{-1}$ AMS + 1.6mg  $mL^{-1}$   $CD_{N/Au1}$ ; (b): a + 3.33  $\mu g L^{-1}$   $PO_4^{3-}$ ; (c): a + 6.66  $\mu g L^{-1}$   $PO_4^{3-}$ ; (d): a + 9.99  $\mu g L^{-1}$   $PO_4^{3-}$ ; (e): a + 13.32  $\mu g L^{-1}$   $PO_4^{3-}$ ; (f): a + 16.65  $\mu g L^{-1}$   $PO_4^{3-}$ .

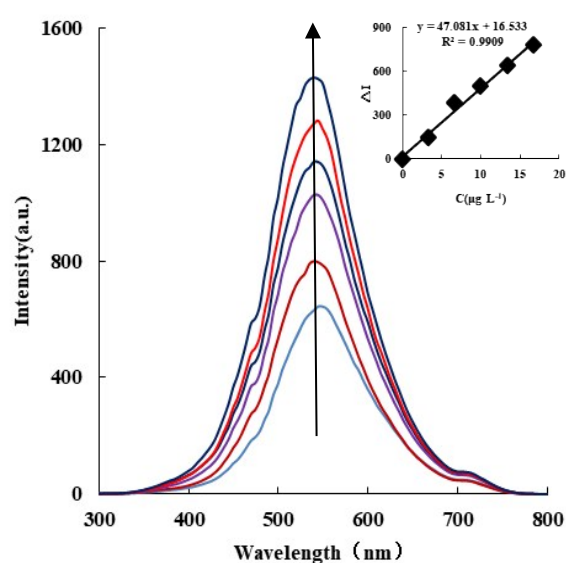

**Fig. S6** RRS spectrum of  $CD_{N/Au4}$ -AMS- $PO_4^{3-}$  system (a): 75mM  $H_2SO_4$  +  $PO_4^{3-}$  + 3.33mg  $mL^{-1}$ AMS + 1.6mg  $mL^{-1}$   $CD_{N/Au4}$ ; (b): a + 3.33  $\mu g L^{-1}$   $PO_4^{3-}$ ; (c): a + 6.66  $\mu g L^{-1}$   $PO_4^{3-}$ ; (d): a + 9.99  $\mu g L^{-1}$   $PO_4^{3-}$ ; (e): a + 13.32  $\mu g L^{-1}$   $PO_4^{3-}$ ; (f): a + 16.65  $\mu g L^{-1}$   $PO_4^{3-}$ .

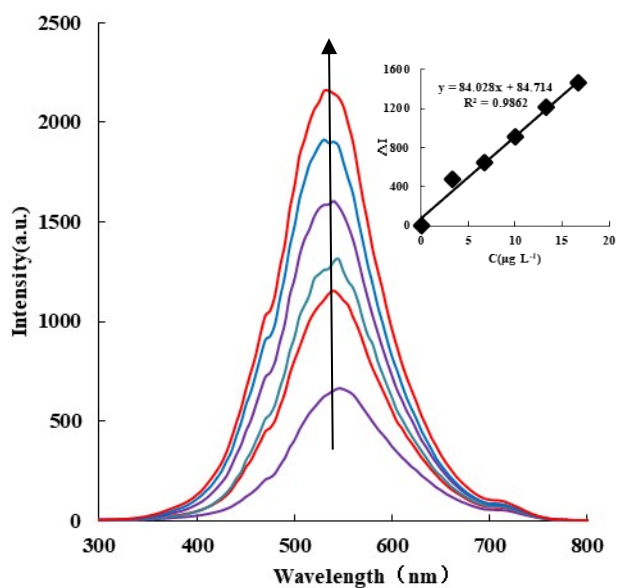

**Fig. S5** RRS spectrum of  $CD_{N/Au3}$ -AMS- $PO_4^{3-}$  system (a): 75mM  $H_2SO_4$  +  $PO_4^{3-}$  + 3.33mg  $mL^{-1}$ AMS + 1.6mg  $mL^{-1}$   $CD_{N/Au3}$ ; (b): a + 3.33  $\mu g L^{-1}$   $PO_4^{3-}$ ; (c): a + 6.66  $\mu g L^{-1}$   $PO_4^{3-}$ ; (d): a + 9.99  $\mu g L^{-1}$   $PO_4^{3-}$ ; (e): a + 13.32  $\mu g L^{-1}$   $PO_4^{3-}$ ; (f): a + 16.65  $\mu g L^{-1}$   $PO_4^{3-}$ .

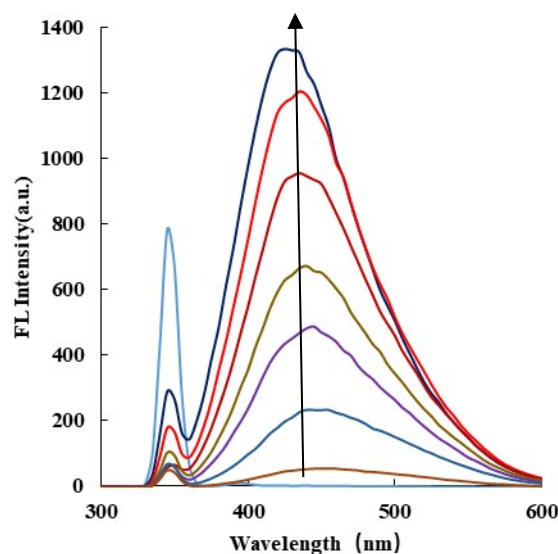

**Fig. S7** Fluorescence spectrum of  $CD_{N/Au2}$  system a: 0 mg  $mL^{-1}$   $CD_{N/Au2}$ ; b: 0.08mg  $mL^{-1}$   $CD_{N/Au2}$ ; c: 0.24 mg  $mL^{-1}$   $CD_{N/Au2}$ ; d: 0.32 mg  $mL^{-1}$   $CD_{N/Au2}$ ; e: 0.4 mg  $mL^{-1}$   $CD_{N/Au2}$ ; f: 0.48 mg  $mL^{-1}$   $CD_{N/Au2}$ ; g: 0.72 mg  $mL^{-1}$   $CD_{N/Au2}$ ; h: 0.80 mg  $mL^{-1}$   $CD_{N/Au2}$ .

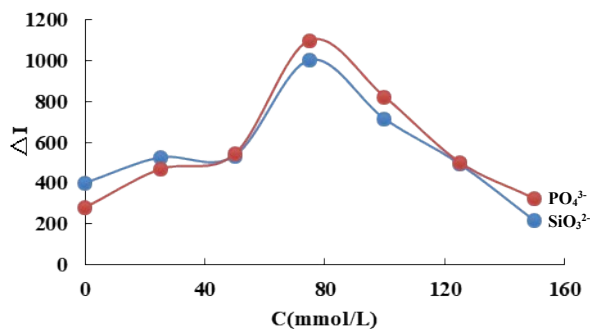

**Fig. S8a** Effect of  $\text{H}_2\text{SO}_4$  concentration on  $\Delta I$   $\text{H}_2\text{SO}_4 + 10 \mu\text{g L}^{-1} \text{SiO}_3^{2-} (10 \mu\text{g L}^{-1} \text{PO}_4^{3-}) + 3.33 \text{mg mL}^{-1} \text{AMS} + 1.6 \text{mg mL}^{-1} \text{CD}_{\text{N/Au}2}$

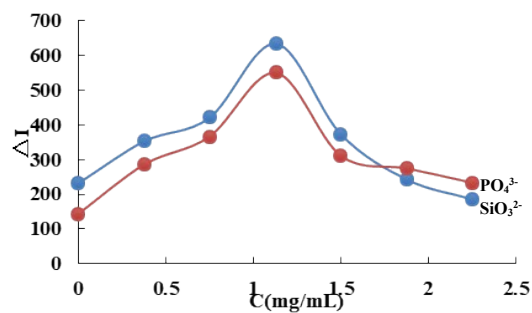

**Fig. S8c** Effect of CAS concentration on  $\Delta I$   $75 \text{mM} \text{H}_2\text{SO}_4 + 10 \mu\text{g L}^{-1} \text{SiO}_3^{2-} (10 \mu\text{g L}^{-1} \text{PO}_4^{3-}) + 3.33 \text{mg mL}^{-1} \text{AMS} + \text{CAS} + 1.6 \text{mg mL}^{-1} \text{CD}_{\text{N/Au}2}$

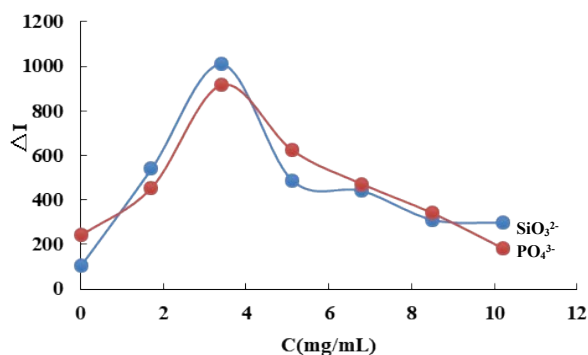

**Fig. S8b** Effect of AMS concentration on  $\Delta I$   $75 \text{mM} \text{H}_2\text{SO}_4 + 10 \mu\text{g L}^{-1} \text{SiO}_3^{2-} (10 \mu\text{g L}^{-1} \text{PO}_4^{3-}) + \text{AMS} + 1.6 \text{mg mL}^{-1} \text{CD}_{\text{N/Au}2}$

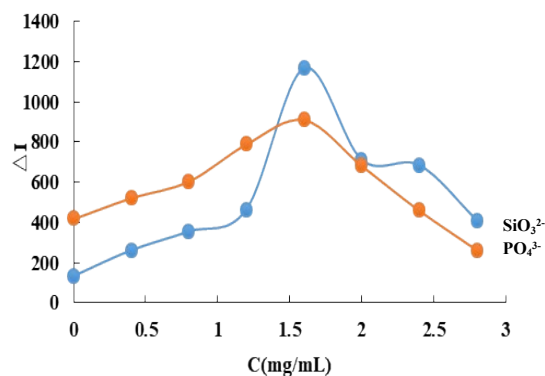

**Fig. S8d** Effect of  $\text{CD}_{\text{N/Au}2}$  concentration on  $\Delta I$   $75 \text{mM} \text{H}_2\text{SO}_4 + 10 \mu\text{g L}^{-1} \text{SiO}_3^{2-} (10 \mu\text{g L}^{-1} \text{PO}_4^{3-}) + 3.33 \text{mg mL}^{-1} \text{AMS}$

**Table S1** The RRS analytical properties of  $\text{SiO}_3^{2-}/\text{PO}_4^{3-}$  with CD probes

| System                                       | LR ( $\mu\text{g L}^{-1}$ ) | Regression equation                     | Coefficient | DL ( $\mu\text{g L}^{-1}$ ) |
|----------------------------------------------|-----------------------------|-----------------------------------------|-------------|-----------------------------|
| $\text{SiO}_3^{2-}\text{-CD}_\text{N}$       | 3.33-19.98                  | $\Delta I = 36.8 C_{\text{Si}} - 10.8$  | 0.9533      | 1                           |
| $\text{SiO}_3^{2-}\text{-CD}_{\text{N/Au}1}$ | 3.33-19.98                  | $\Delta I = 65.2 C_{\text{Si}} + 77.3$  | 0.9379      | 1                           |
| $\text{SiO}_3^{2-}\text{-CD}_{\text{N/Au}2}$ | 1.11-19.98                  | $\Delta I = 144.6 C_{\text{Si}} - 191$  | 0.9687      | 0.3                         |
| $\text{SiO}_3^{2-}\text{-CD}_{\text{N/Au}3}$ | 3.33-16.65                  | $\Delta I = 101.7 C_{\text{Si}} - 99.0$ | 0.9839      | 1                           |
| $\text{SiO}_3^{2-}\text{-CD}_{\text{N/Au}4}$ | 3.33-16.65                  | $\Delta I = 53.0 C_{\text{Si}} + 88.6$  | 0.959       | 1                           |
| $\text{PO}_4^{3-}\text{-CD}_\text{N}$        | 3.33-19.98                  | $\Delta I = 35.0 C_{\text{P}} - 49.2$   | 0.9596      | 1                           |
| $\text{PO}_4^{3-}\text{-CD}_{\text{N/Au}1}$  | 3.33-19.98                  | $\Delta I = 53.0 C_{\text{P}} + 110.7$  | 0.9068      | 1                           |

| ARTICLE                                     | Journal Name |                                                 |        |     |  |
|---------------------------------------------|--------------|-------------------------------------------------|--------|-----|--|
| $\text{PO}_4^{3-}\text{-CD}_{\text{N/Au}2}$ | 1.11-19.98   | $\Delta/\text{= } 134.9 \text{ C}_p\text{-}162$ | 0.9859 | 0.3 |  |
| $\text{PO}_4^{3-}\text{-CD}_{\text{N/Au}3}$ | 3.33-16.65   | $\Delta/\text{= } 84.0 \text{ C}_p\text{+}84.7$ | 0.9862 | 1   |  |
| $\text{PO}_4^{3-}\text{-CD}_{\text{N/Au}4}$ | 3.33-16.65   | $\Delta/\text{= } 47.1 \text{ C}_p\text{+}16.5$ | 0.9909 | 1   |  |

**Table S2 Comparison of some of the reported analytical methods for continuous determination of  $\text{SiO}_3^{2-}$  and  $\text{PO}_4^{3-}$**

| Method                                                                                        | Principle                                                                                                                                                                                                                                                                                                                                     | Linear range                                                                                                | Detection limit                                                                                                 | Comments                                                               | RSD                                                                | Ref.        |
|-----------------------------------------------------------------------------------------------|-----------------------------------------------------------------------------------------------------------------------------------------------------------------------------------------------------------------------------------------------------------------------------------------------------------------------------------------------|-------------------------------------------------------------------------------------------------------------|-----------------------------------------------------------------------------------------------------------------|------------------------------------------------------------------------|--------------------------------------------------------------------|-------------|
| Flow injection analysis                                                                       | The analyte was reacted with AMS to form molybdenum phosphate and molybdenum silicic acid, and the oxalic acid solution was injected and combined with the sample stream containing the heteropolyacid mixture. The area and the absorbance measured at the peak can be used to measure phosphates and silicates.                             | 0.20-15.00 mg L <sup>-1</sup><br>$\text{PO}_4^{3-}$<br>0.20-20.00 mg L <sup>-1</sup><br>$\text{SiO}_3^{2-}$ | $\text{PO}_4^{3-}$ :0.054mg L <sup>-1</sup><br>$\text{SiO}_3^{2-}$ :0.092mg L <sup>-1</sup>                     | Complicated operation                                                  | $\text{PO}_4^{3-}$ :2.7%<br>$\text{SiO}_3^{2-}$ :0.9%              | [29]        |
| Ion Exclusion Chromatography (IEC) and Inductively Coupled Plasma Mass Spectrometry (SF-ICPM) | The dissolved silicate was determined by double isotope dilution using Si spikes, while the phosphate was quantified using a one point weight standard addition with an internal standard of the same Si spike.                                                                                                                               | 0-1.670 $\mu\text{M}$ $\text{PO}_4^{3-}$<br>0-30.20 $\mu\text{M}$ $\text{SiO}_3^{2-}$                       | $\text{PO}_4^{3-}$ :0.18ng g <sup>-1</sup><br>$\text{SiO}_3^{2-}$ :0.11 ng g <sup>-1</sup>                      | Complicated operation                                                  | $\text{PO}_4^{3-}$ :0.47%<br>$\text{SiO}_3^{2-}$ :0.31%            | [28]        |
| Electrochemical method                                                                        | Based on the electroactive properties of molybdenum silicate and molybdate phosphate complexes, silicates and phosphates were determined using microdisk electrodes.                                                                                                                                                                          | 1-100 $\mu\text{M}$                                                                                         | —                                                                                                               | Low sensitivity                                                        | —                                                                  | [30]        |
| Cross-injection analysis (CIA) - spectrophotometry                                            | PMo blue and SiMo blue products were produced in the presence of stannous chloride, and phosphate and silicate were simultaneously analyzed by spectrophotometry.                                                                                                                                                                             | 0.1-6 mg L <sup>-1</sup> $\text{PO}_4^{3-}$<br>5-100 mg L <sup>-1</sup> $\text{SiO}_3^{2-}$                 | —                                                                                                               | No need to use any reagents to modify and add selective masking agents | $\text{PO}_4^{3-}$ :1.76%<br>$\text{SiO}_3^{2-}$ :1.53%            | [31]        |
| Chemical sensor                                                                               | The coordination between the carboxyl group of polyacrylic acid and the Cd atom on the surface of QDs quenched the fluorescence. The addition of a silicate or phosphate anion resulted in a fluorescence recovery.                                                                                                                           | —                                                                                                           | 0.76mM $\text{PO}_4^{3-}$<br>0.02mM $\text{SiO}_3^{2-}$                                                         | Low sensitivity                                                        | —                                                                  | [32]        |
| RSS                                                                                           | Both $\text{SiO}_3^{2-}$ and $\text{PO}_4^{3-}$ reacted with AMS to form SiMo and PMo. Citric acid was added, and the PMo was decomposed. As the concentration of $\text{SiO}_3^{2-}$ ( $\text{PO}_4^{3-}$ ) increased, the SiMo (PMo) adhered to the $\text{CD}_{\text{N/Au}}$ surface, resulting in a linear increase in the RRS at 555 nm. | 3.33-19.98 $\mu\text{g}$ L <sup>-1</sup>                                                                    | 0.32 $\mu\text{g}$ L <sup>-1</sup> $\text{PO}_4^{3-}$<br>0.28 $\mu\text{g}$ L <sup>-1</sup> $\text{SiO}_3^{2-}$ | Simple, High sensitivity                                               | $\text{PO}_4^{3-}$ :0.55-2.1%.<br>$\text{SiO}_3^{2-}$ :0.28-1.48%. | This method |

**Table S3A Effect of interference on RRS determination of silicates**

| Coexisting substance         | Tolerance (times) | Relative error (%) | Coexisting substance          | Tolerance (times) | Relative error (%) |
|------------------------------|-------------------|--------------------|-------------------------------|-------------------|--------------------|
| Na <sup>+</sup>              | 100               | -7.78%             | glutamic acid                 | 70                | -2.84%             |
| Fe <sup>2+</sup>             | 100               | -9.28%             | glycine                       | 70                | -4.14%             |
| Al <sup>3+</sup>             | 100               | 7.37%              | Fe <sup>3+</sup>              | 70                | 2.56%              |
| Co <sup>2+</sup>             | 100               | -9.09%             | Hg <sup>2+</sup>              | 70                | -6.68%             |
| Mn <sup>2+</sup>             | 100               | -0.06%             | Cu <sup>2+</sup>              | 70                | -4.22%             |
| F <sup>-</sup>               | 100               | -7.26%             | Br <sup>-</sup>               | 70                | 2.38%              |
| Ba <sup>2+</sup>             | 100               | 4.74%              | CO <sub>3</sub> <sup>2-</sup> | 70                | -2.78%             |
| K <sup>+</sup>               | 100               | 1.9%               | I <sup>-</sup>                | 70                | -2.36%             |
| Cr <sup>6+</sup>             | 100               | 4.74%              | Ca <sup>2+</sup>              | 50                | -7.24%             |
| NO <sub>2</sub> <sup>-</sup> | 100               | 1.05%              | Cr <sup>3+</sup>              | 50                | -1.79%             |
| NH <sub>4</sub> <sup>+</sup> | 70                | -2.55%             | HCO <sub>3</sub> <sup>-</sup> | 50                | -5.66%             |
| Mg <sup>2+</sup>             | 70                | -3.66%             | phenylalanine                 | 50                | -7.35%             |
| Zn <sup>2+</sup>             | 70                | -3.52%             | SO <sub>4</sub> <sup>2-</sup> | 50                | -5.34%             |

Table S3B Effect of interference on RRS determination of phosphates

| Coexisting substance         | Tolerance (times) | Relative error (%) | Coexisting substance          | Tolerance (times) | Relative error (%) |
|------------------------------|-------------------|--------------------|-------------------------------|-------------------|--------------------|
| Na <sup>+</sup>              | 100               | -6.45%             | glutamic acid                 | 70                | -3.64%             |
| Fe <sup>2+</sup>             | 100               | -7.58%             | glycine                       | 70                | -6.34%             |
| Al <sup>3+</sup>             | 100               | 4.65%              | Fe <sup>3+</sup>              | 70                | 1.45%              |
| Co <sup>2+</sup>             | 100               | -8.46%             | Hg <sup>2+</sup>              | 70                | -4.35%             |
| Mn <sup>2+</sup>             | 100               | 1.24%              | Cu <sup>2+</sup>              | 70                | 3.21%              |
| F <sup>-</sup>               | 100               | -9.53%             | Br <sup>-</sup>               | 70                | -1.32%             |
| Ba <sup>2+</sup>             | 100               | 5.73%              | CO <sub>3</sub> <sup>2-</sup> | 70                | -1.86%             |
| K <sup>+</sup>               | 100               | 2.41%              | I <sup>-</sup>                | 70                | -4.65%             |
| Cr <sup>6+</sup>             | 100               | -3.42%             | Ca <sup>2+</sup>              | 50                | 4.67%              |
| NO <sub>2</sub> <sup>-</sup> | 100               | 3.26%              | Cr <sup>3+</sup>              | 50                | 1.15%              |
| NH <sub>4</sub> <sup>+</sup> | 70                | -6.25%             | HCO <sub>3</sub> <sup>-</sup> | 50                | -6.88%             |
| Mg <sup>2+</sup>             | 70                | 2.54%              | phenylalanine                 | 50                | -5.24%             |
| Zn <sup>2+</sup>             | 70                | 4.61%              | SO <sub>4</sub> <sup>2-</sup> | 50                | -4.69%             |

Table S4A Results for the detection of dissolve silicate in samples

| Water samples | Single value (µg L <sup>-1</sup> ) | Average value (µg L <sup>-1</sup> ) | Added silicate (µg L <sup>-1</sup> ) | Recovery (%) | RSD (%) | Found silicates (mg L <sup>-1</sup> ) |
|---------------|------------------------------------|-------------------------------------|--------------------------------------|--------------|---------|---------------------------------------|
| A             | 11.96, 11.98, 12.11, 12.15, 12.21  | 12.08                               | 3.33                                 | 106.2        | 0.9     | 0.6                                   |
| B             | 12.45, 12.36, 12.41, 12.32, 12.39  | 12.39                               | 3.33                                 | 97.8         | 0.4     | 0.62                                  |
| C             | 9.16, 8.98, 9.20, 9.25, 8.95       | 9.11                                | 3.33                                 | 112.1        | 1.48    | 0.46                                  |
| D             | 9.64, 9.66, 9.61, 9.70, 9.68       | 9.66                                | 3.33                                 | 104.3        | 0.36    | 0.48                                  |
| E             | 8.64, 8.62, 8.71, 8.68, 8.69       | 8.67                                | 3.33                                 | 107.8        | 0.43    | 0.43                                  |
| F             | 10.34, 10.31, 10.33                | 10.31                               | 3.33                                 | 94.7         | 0.28    | 0.52                                  |

10.29, 10.27

**Table S4B Results for the detection of phosphate in samples**

| Water samples | Single value ( $\mu\text{g L}^{-1}$ ) | Average value ( $\mu\text{g L}^{-1}$ ) | Added phosphate ( $\mu\text{g L}^{-1}$ ) | Recovery (%) | RSD (%) | Found phosphates ( $\text{mg L}^{-1}$ ) |
|---------------|---------------------------------------|----------------------------------------|------------------------------------------|--------------|---------|-----------------------------------------|
| A             | 1.66, 1.65, 1.61,<br>1.60, 1.58       | 1.62                                   | 3.33                                     | 105.5        | 2.10    | 0.08                                    |
| B             | 2.89, 2.9, 2.88,<br>2.91, 2.87        | 2.89                                   | 3.33                                     | 114.2        | 0.55    | 0.14                                    |
| C             | 2.39, 2.41, 2.34,<br>2.31, 2.41       | 2.37                                   | 3.33                                     | 113.7        | 1.89    | 0.12                                    |
| D             | 4.82, 4.79, 4.84,<br>4.73, 4.82       | 4.80                                   | 3.33                                     | 95.8         | 0.90    | 0.24                                    |
| E             | 2.12, 2.1, 2.08,<br>2.12, 2.09        | 2.10                                   | 3.33                                     | 103.6        | 0.85    | 0.11                                    |
| F             | 1.55, 1.56, 1.54,<br>1.53, 1.56       | 1.55                                   | 3.33                                     | 97.4         | 0.84    | 0.08                                    |
